# Supplementary material
Source: publisher site journal article supplement (https://www.e-cmh.org/upload/media/cmh-2023-0057-Supplementary-Table-6.pdf)
Supplement: Supplementary file 1 [file cmh-2023-0057-Supplementary-Table-6.pdf]

**Supplementary Table 6.** Cox regression analysis of factors associated PFS (A) before and (B) after IPTW  
(A) Before IPTW

| Variables                       | Crude HR (95% CI) | P-value | Adjusted HR (95% CI) | P-value |
|---------------------------------|-------------------|---------|----------------------|---------|
| <b>Sex</b>                      |                   |         |                      |         |
| Female                          | 1 [Reference]     |         |                      |         |
| Male                            | 1.14 (0.92–1.40)  | 0.24    |                      |         |
| <b>Age</b>                      |                   |         |                      |         |
| ≤60 years                       | 1 [Reference]     |         | 1 [Reference]        |         |
| >60 years                       | 1.99 (1.59–2.49)  | <0.001  | 1.29 (1.01–1.64)     | 0.04    |
| <b>HBV infection</b>            |                   |         |                      |         |
| Non-CHB group                   | 1 [Reference]     |         | 1 [Reference]        |         |
| CHB group                       | 0.61 (0.40–0.94)  | 0.03    | 0.56 (0.37–0.87)     | 0.01    |
| <b>Ann Arbor classification</b> |                   |         |                      |         |
| Early (I–II)                    | 1 [Reference]     |         | 1 [Reference]        |         |
| Advanced (III–IV)               | 3.09 (2.42–3.95)  | <0.001  | 1.63 (1.23–2.17)     | <0.001  |
| LDH                             | 3.31 (2.66–4.13)  | <0.001  | 2.11 (1.66–2.69)     | <0.001  |
| <b>Underlying liver status</b>  |                   |         |                      |         |
| No cirrhosis                    | 1 [Reference]     |         | 1 [Reference]        |         |
| Cirrhosis                       | 1.86 (1.29–2.68)  | <0.001  | 1.30 (0.88–1.92)     | 0.19    |
| <b>Extranodal involvement</b>   |                   |         |                      |         |
| No                              | 1 [Reference]     |         | 1 [Reference]        |         |
| Yes                             | 1.60 (1.24–2.05)  | <0.001  | 1.35 (1.04–1.75)     | 0.02    |
| <b>IPI risk</b>                 |                   |         |                      |         |
| Low/Low-intermediate            | 1 [Reference]     |         | 1 [Reference]        |         |
| High/High-intermediate          | 3.15 (2.50–3.97)  | <0.001  | 1.76 (1.35–2.30)     | <0.001  |
| <b>BM involvement</b>           |                   |         |                      |         |
| No                              | 1 [Reference]     |         | 1 [Reference]        |         |
| Yes                             | 2.34 (1.84–2.97)  | <0.001  | 1.64 (1.26–2.15)     | <0.001  |
| <b>Subtype of DLBCL</b>         |                   |         |                      |         |
| GCB                             | 1 [Reference]     |         | 1 [Reference]        |         |
| Non-GCB                         | 1.54 (1.23–1.94)  | <0.001  | 1.29 (1.02–1.64)     | 0.03    |

**Supplementary Table 6.** Continued

(B) After IPTW

| Variables                       | Crude HR (95% CI) | P-value | Adjusted HR (95% CI) | P-value |
|---------------------------------|-------------------|---------|----------------------|---------|
| <b>Sex</b>                      |                   |         |                      |         |
| Female                          | 1 [Reference]     |         |                      |         |
| Male                            | 0.72 (0.48–1.07)  | 0.10    |                      |         |
| <b>Age</b>                      |                   |         |                      |         |
| ≤60 years                       | 1 [Reference]     |         | 1 [Reference]        |         |
| >60 years                       | 1.84 (1.23–2.74)  | 0.002   | 1.07 (0.69–1.67)     | 0.74    |
| <b>HBV infection</b>            |                   |         |                      |         |
| Non-CHB group                   | 1 [Reference]     |         | 1 [Reference]        |         |
| CHB group                       | 0.53 (0.34–0.82)  | 0.004   | 0.50 (0.32–0.77)     | 0.002   |
| <b>Ann Arbor classification</b> |                   |         |                      |         |
| Early (I–II)                    | 1 [Reference]     |         | 1 [Reference]        |         |
| Advanced (III–IV)               | 4.42 (2.61–7.47)  | <0.001  | 3.09 (1.79–5.32)     | <0.001  |
| LDH                             | 2.39 (1.59–3.62)  | <0.001  | 1.05 (0.69–1.60)     | 0.81    |
| <b>Underlying liver status</b>  |                   |         |                      |         |
| No cirrhosis                    | 1 [Reference]     |         | 1 [Reference]        |         |
| Cirrhosis                       | 3.27 (1.94–5.52)  | <0.001  | 2.14 (1.25–3.67)     | <0.001  |
| <b>Extranodal involvement</b>   |                   |         |                      |         |
| No                              | 1 [Reference]     |         | 1 [Reference]        |         |
| Yes                             | 1.06 (0.64–1.76)  | 0.81    | 0.78 (0.47–1.30)     | 0.34    |
| <b>IPI risk</b>                 |                   |         |                      |         |
| Low/Low-intermediate            | 1 [Reference]     |         | 1 [Reference]        |         |
| High/High-intermediate          | 4.11 (2.64–6.40)  | <0.001  | 2.63 (1.57–4.40)     | <0.001  |
| <b>BM involvement</b>           |                   |         |                      |         |
| No                              | 1 [Reference]     |         |                      |         |
| Yes                             | 1.08 (0.97–1.19)  | 0.17    |                      |         |
| <b>Subtype of DLBCL</b>         |                   |         |                      |         |
| GCB                             | 1 [Reference]     |         | 1 [Reference]        |         |
| Non-GCB                         | 0.93 (0.84–1.02)  | 0.12    | 0.99 (0.90–1.08)     | 0.76    |

BM, bone marrow; CHB, chronic hepatitis B; CI, confidence interval; DLBCL, diffuse large B-cell lymphoma; GCB, germinal center B cell; HBV, hepatitis B virus; HR, hazard ratio; IPI, International Prognostic Index; IPTW, inverse probability of treatment weighting; LDH, lactate dehydrogenase; PFS, progression-free survival.
